# Supplementary material for: Clinical Tick Borne Encephalitis in a Roe Deer (Capreolus capreolus L.)
Source: Preprints.org preprint supplement (doi:10.20944/preprints202201.0462.v1), 2022-01-31
Supplement: Supplementary file 1 [file supplementary]

**Table S1**: Amino acid mutations observed from the comparison of 21RS1767, AS33 and Neudoerfl in E and NS5 proteins.

| **Protein** | **AA polyprotein** | **AA protein** | **21RS1767** | **GQ266392 (AS33)** | **U27495 (Neudoerfl)** | **Domain/Region** |
| --- | --- | --- | --- | --- | --- | --- |
| **E** | 331 | 51 | E | D | E | central domain (I) |
| 361 | 81 | T | I | T | dimerization domain (II) |
| 408 | 128 | I | I | T | central domain (I) |
| 447 | 167 | V | V | I | / |
| 761 | 481 | I | L | L | flavi_E_stem |
| **NS5** | 2532 | 21 | R | K | R | mRNA cap 0 and cap 1 methyltransfe domain |
| 2559 | 48 | E | K | E |
| 2562 | 58 | M | M | V |
| 2619 | 108 | R | R | K |
| 2764 | 253 | R | R | K |
| 2905 | 394 | L | L | M | / |
| 2908 | 397 | K | K | R | / |
| 2945 | 434 | H | H | R | / |
| 3297 | 786 | V | V | A | RdRp catalytic |
| 3366 | 855 | K | K | R | / |
